# Supplementary material
Source: MDPI journal article supplement (https://www.mdpi.com/1999-4907/13/7/1087)
Supplement: s1 [file s1]

**Table S1.** Top 68 Keywords with the Strongest Citation Bursts.

| Keywords              | Year | Strength | Begin | End  | 1997 - 2019 |
|-----------------------|------|----------|-------|------|-------------|
| population            | 1997 | 11.7468  | 1997  | 2011 |             |
| ecosystem management  | 1997 | 33.7193  | 1997  | 2010 |             |
| costa rica            | 1997 | 10.7418  | 1998  | 2009 |             |
| national forest       | 1997 | 4.126    | 1998  | 2000 |             |
| value                 | 1997 | 3.4401   | 1998  | 2005 |             |
| gi                    | 1997 | 19.0844  | 1998  | 2012 |             |
| ecology               | 1997 | 15.5898  | 1999  | 2014 |             |
| ecosystem             | 1997 | 18.7302  | 1999  | 2010 |             |
| abundance             | 1997 | 4.5806   | 2000  | 2010 |             |
| variability           | 1997 | 3.3839   | 2000  | 2003 |             |
| hydrology             | 1997 | 8.5802   | 2000  | 2011 |             |
| nitrogen              | 1997 | 6.3705   | 2000  | 2007 |             |
| watershed             | 1997 | 8.3834   | 2000  | 2009 |             |
| quality               | 1997 | 4.9817   | 2001  | 2008 |             |
| economic value        | 1997 | 9.5326   | 2001  | 2010 |             |
| land                  | 1997 | 7.4187   | 2001  | 2011 |             |
| wildfire              | 1997 | 3.3885   | 2002  | 2004 |             |
| boreal forest         | 1997 | 8.0249   | 2002  | 2010 |             |
| environment           | 1997 | 11.4585  | 2003  | 2010 |             |
| habitat fragmentation | 1997 | 7.7015   | 2003  | 2007 |             |
| ecosystem function    | 1997 | 13.0547  | 2003  | 2012 |             |
| conservation planning | 1997 | 3.7802   | 2003  | 2008 |             |
| fragmentation         | 1997 | 28.1119  | 2003  | 2015 |             |
| resource              | 1997 | 4.6677   | 2003  | 2010 |             |

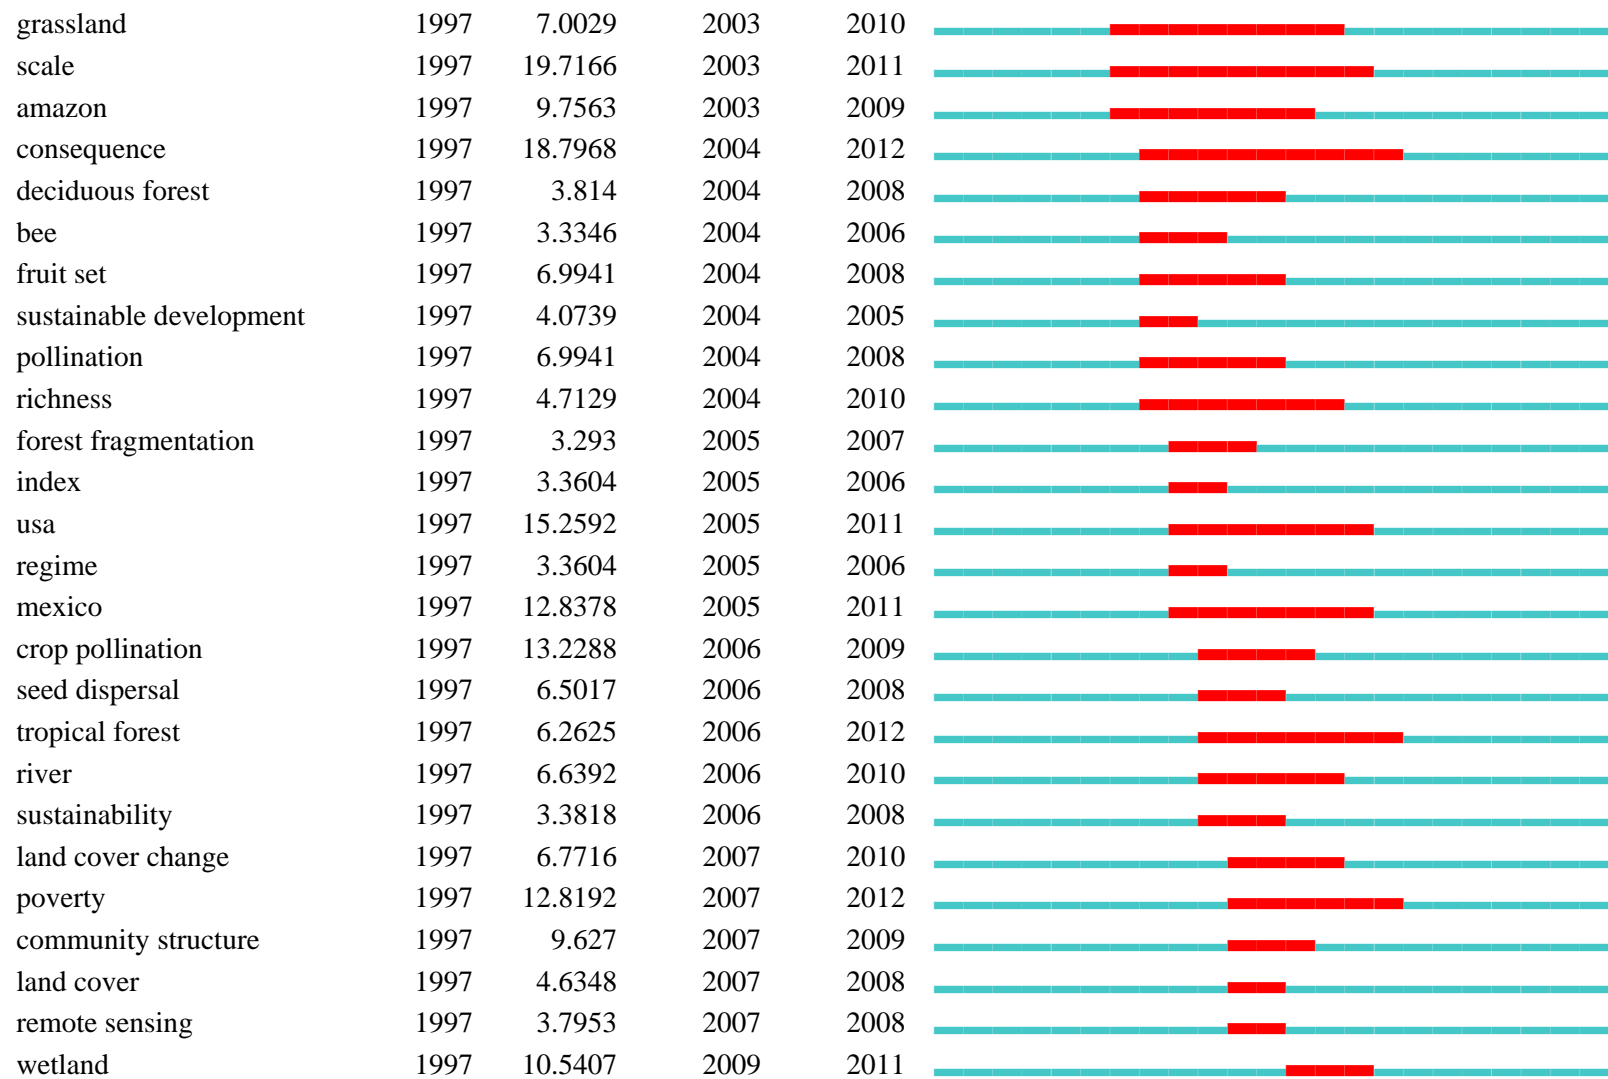

|                        |      |         |      |      |                                                                                     |
|------------------------|------|---------|------|------|-------------------------------------------------------------------------------------|
| agricultural landscape | 1997 | 9.4657  | 2010 | 2011 |  |
| disturbance            | 1997 | 3.7676  | 2010 | 2011 |  |
| emission               | 1997 | 23.363  | 2010 | 2014 |  |
| habitat                | 1997 | 18.3725 | 2011 | 2014 |  |
| redd                   | 1997 | 32.3532 | 2011 | 2014 |  |
| environmental service  | 1997 | 9.1158  | 2012 | 2014 |  |
| productivity           | 1997 | 14.3811 | 2012 | 2014 |  |
| governance             | 1997 | 5.2788  | 2012 | 2013 |  |
| agriculture            | 1997 | 11.5771 | 2013 | 2015 |  |
| water                  | 1997 | 13.109  | 2014 | 2015 |  |
| sequestration          | 1997 | 12.117  | 2014 | 2015 |  |
| fire                   | 1997 | 8.2443  | 2015 | 2016 |  |
| carbon storage         | 1997 | 24.5738 | 2016 | 2017 |  |
| resilience             | 1997 | 7.2236  | 2016 | 2019 |  |
| trade off              | 1997 | 20.483  | 2016 | 2019 |  |
| area                   | 1997 | 17.7884 | 2017 | 2019 |  |
| system                 | 1997 | 6.0867  | 2017 | 2019 |  |
| china                  | 1997 | 34.954  | 2017 | 2019 |  |
